# Supplementary material for: Health Risk Assessment and Source Apportionment of Mercury, Lead, Cadmium, Selenium, and Manganese in Japanese Women: An Adjunct Study to the Japan Environment and Children’s Study
Source: PubMed Central journal article supplement (PMC7177228; doi:10.3390/ijerph17072231), 2020-03-26
Supplement: ijerph-17-02231-s001.pdf [file ijerph-17-02231-s001.pdf]

# Supplementary Material

**Table 1.** Basic information for participants (N = 37).

| Personal Information       | Median (25th–75th)     | Mean (SD)      | Range      |
|----------------------------|------------------------|----------------|------------|
| Daily food consumption (g) | 1678.2 (1288.9–2018.8) | 1696.5 (657.6) | 391–3529.5 |
| Height (cm)                | 157 (155–161)          | 157.4 (4.6)    | 148–168.2  |
| Body weight (kg)           | 54 (51–59)             | 55.7 (9.4)     | 41–85      |
| BMI                        | 22.2 (20.8–23.3)       | 22.5 (3.5)     | 16.2–32    |

**Table 2.** Analytical instruments.

| Mn, Se, Cd, Pb: ICP-MS (7500 cx, Agilent Technologies)          |                    |
|-----------------------------------------------------------------|--------------------|
| RF power: 1,550 W                                               |                    |
| Carrier gas: 0.90 L/min                                         |                    |
| Make-up gas: 0.20 L/min                                         |                    |
| Spray chamber temperature: 2 °C                                 |                    |
| Reaction gas: He, 4.0 L/min (Mn); H <sub>2</sub> 4.4 L/min (Se) |                    |
| Monitored ion (m/z)                                             |                    |
| Mn: 55                                                          | Ge (internal): 72  |
| Se: 78                                                          | Ge (internal): 72  |
| Cd: 111                                                         | Ge (internal): 72  |
| Pb: 208                                                         | Tl (internal): 205 |
| Hg: CVAAS (Automatic Mercury Analyzer HG-201, Sanso)            |                    |
| Method: Cold vapor atomic absorption spectrometry               |                    |
| Wavelength: 253.7 nm                                            |                    |
| Flow: 1–1.5 L/min                                               |                    |

ICP-MS: inductively coupled plasma mass spectrometry; CVAAS: cold vapor atomic absorption spectrometry.

**Table S3.** Analytical results (mg/kg) of certified reference materials.

|               |              | Mn          | Se          | Cd            | Pb            | Hg            |
|---------------|--------------|-------------|-------------|---------------|---------------|---------------|
| NIST SRM 2702 | Measured     | 1735        | 5.36        | 0.823         | 133.2         | -             |
|               | Certified    | 1757        | 4.95        | 0.817         | 132.8         | -             |
|               | (acceptable) | (1699–1785) | (4.49–5.41) | (0.806–0.828) | (131.7–133.9) | -             |
| NIES No. 28   | Measured     | 702         | 14.4        | 5.98          | 424           | -             |
|               | Certified    | 686         | 14.4        | 5.6           | 403           | -             |
|               | (acceptable) | (644–728)   | (-)         | (5.17–6.03)   | (371–435)     | -             |
| NRC DORM-4    | Measured     | 3.28        | 3.63        | 0.310         | 0.448         | 0.389         |
|               | Certified    | 3.17        | 3.45        | 0.299         | 0.404         | 0.412         |
|               | (acceptable) | (2.91–3.43) | (3.05–3.85) | (0.281–0.317) | (0.342–0.466) | (0.376–0.448) |

NIST: National Institute of Standards and Technology; NIES: National Institute for Environmental Studies; NRC: National Research Council Canada.

**Table S4.** Limit of detection (LOD) of metals for each sample type.

| Sample | Unit              | Mn    |          | Se      |          | Cd      |          | Pb     |          | Hg     |          |
|--------|-------------------|-------|----------|---------|----------|---------|----------|--------|----------|--------|----------|
|        |                   | LOD   | ≥LOD (%) | LOD     | ≥LOD (%) | LOD     | ≥LOD (%) | LOD    | ≥LOD (%) | LOD    | ≥LOD (%) |
| Soil   | mg/kg dry         | 0.04  | 100      | 0.007   | 100      | 0.0006  | 100      | 0.06   | 100      | 0.0002 | 100      |
| Food   | µg/g wet          | 0.002 | 100      | 0.00006 | 100      | 0.00005 | 100      | 0.0004 | 100      | 0.0002 | 100      |
| Air    | ng/m <sup>3</sup> | 7     | 5.4      | 0.2     | 37.8     | 0.4     | 13.5     | 5      | 75.7     | 0.05   | 2.7      |
| Dust   | mg/kg             | 0.1   | 100      | 0.001   | 100      | 0.0002  | 100      | 0.003  | 100      | 0.001  | 100      |

Indicates the LOD when the sampling volume was 1000 m<sup>3</sup> (LOD depends on the pump volume). When the concentration was less than the LOD, one-half of the LOD was used for the calculation. Indicates the LOD when sample amount used for analysis was 0.05 g.
